# Supplementary material for: Zr-based metal–organic frameworks for specific and size-selective enrichment of phosphopeptides with simultaneous exclusion of proteins
Source: Royal Society of Chemistry journal article supplement (doi:10.1039/c5tb00113g), 2015-01-01
Supplement: c5tb00113g1.pdf [file c5tb00113g1.pdf]

# Supporting Information

## **Zr-based metal–organic frameworks for specific and size-selective enrichment of phosphopeptides with simultaneous exclusion of proteins**

**Xiangyang Zhu,<sup>a</sup> Jinlou Gu,<sup>\* a</sup> Jian Yang,<sup>a</sup> Zhe Wang,<sup>a</sup> Yongsheng Li,<sup>a</sup> Liming Zhao,<sup>b</sup> Wenru Zhao<sup>a</sup> and Jianlin Shi<sup>a</sup>**

<sup>a</sup>Key Laboratory for Ultrafine Materials of Ministry of Education, School of Materials Science and Engineering, East China University of Science and Technology, Shanghai 200237, China

Fax: +86-21-64250740; Tel: +86-21-64252599

<sup>b</sup>State Key Laboratory of Bioreactor Engineering, R&D Center of Separation and Extraction Technology in Fermentation Industry, East China University of Science and Technology, Shanghai 200237, China

Corresponding author: [jinloug@ecust.edu.cn](mailto:jinloug@ecust.edu.cn)

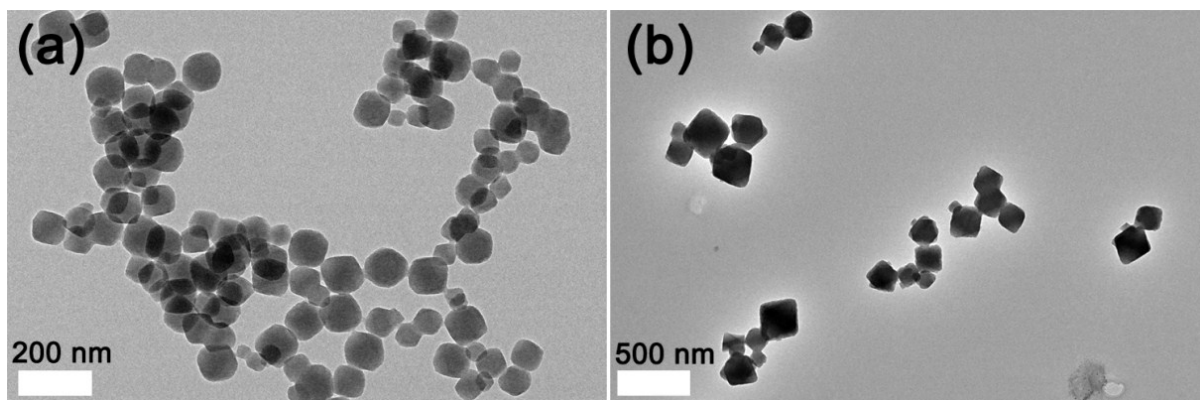

**Fig. S1** TEM images of the as-synthesized (a) UiO-66 and (b) UiO-67 nanoparticles (NPs).

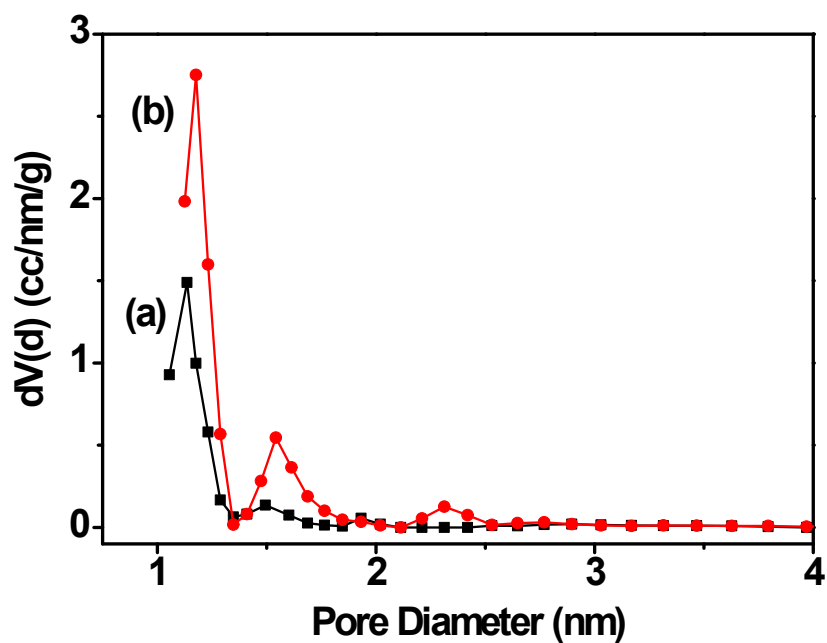

**Fig. S2** DFT pore size distribution of the as-synthesized (a) UiO-66 and (b) UiO-67 NPs.

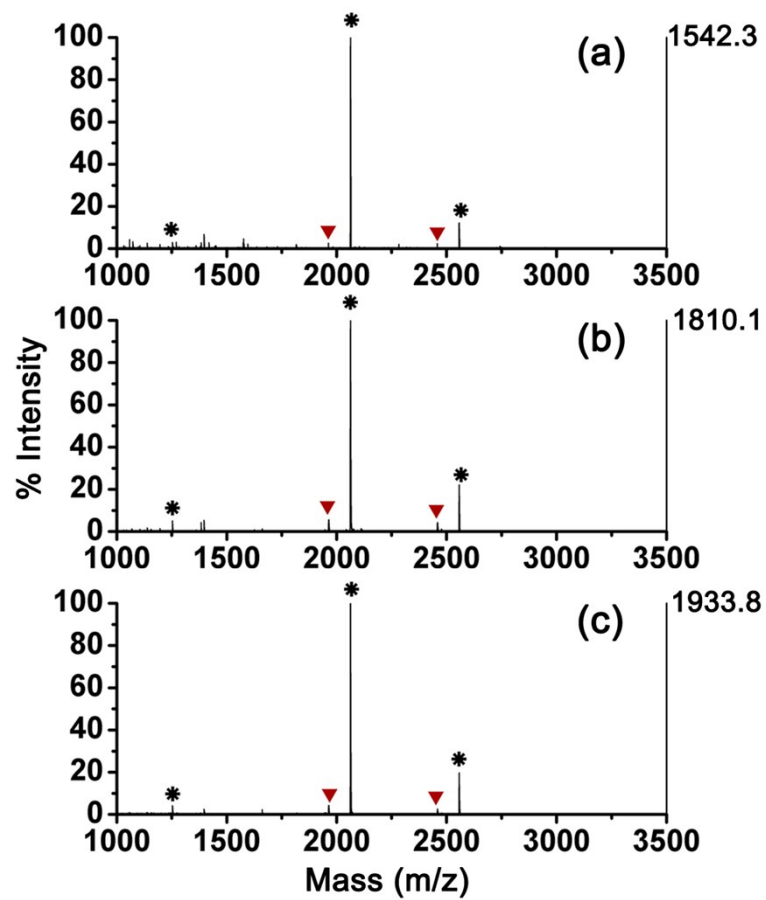

**Fig. S3** MALDI-TOF mass spectra for the peptides derived from  $\beta$ -casein tryptic digest enriched by UiO-67 NPs using the loading buffer containing (a) 0.5%, (b) 1% and (c) 2% TFA.

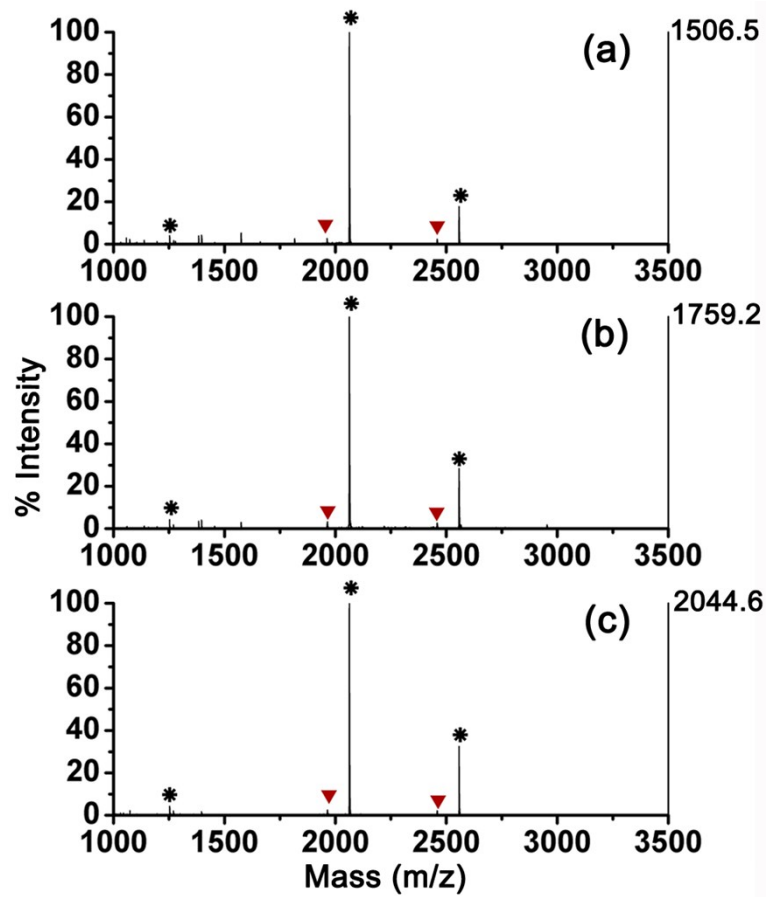

**Fig. S4** MALDI-TOF mass spectra for the peptides derived from  $\beta$ -casein tryptic digest enriched by UiO-67 NPs using the loading buffer containing (a) 10%, (b) 30% and (c) 50% ACN.

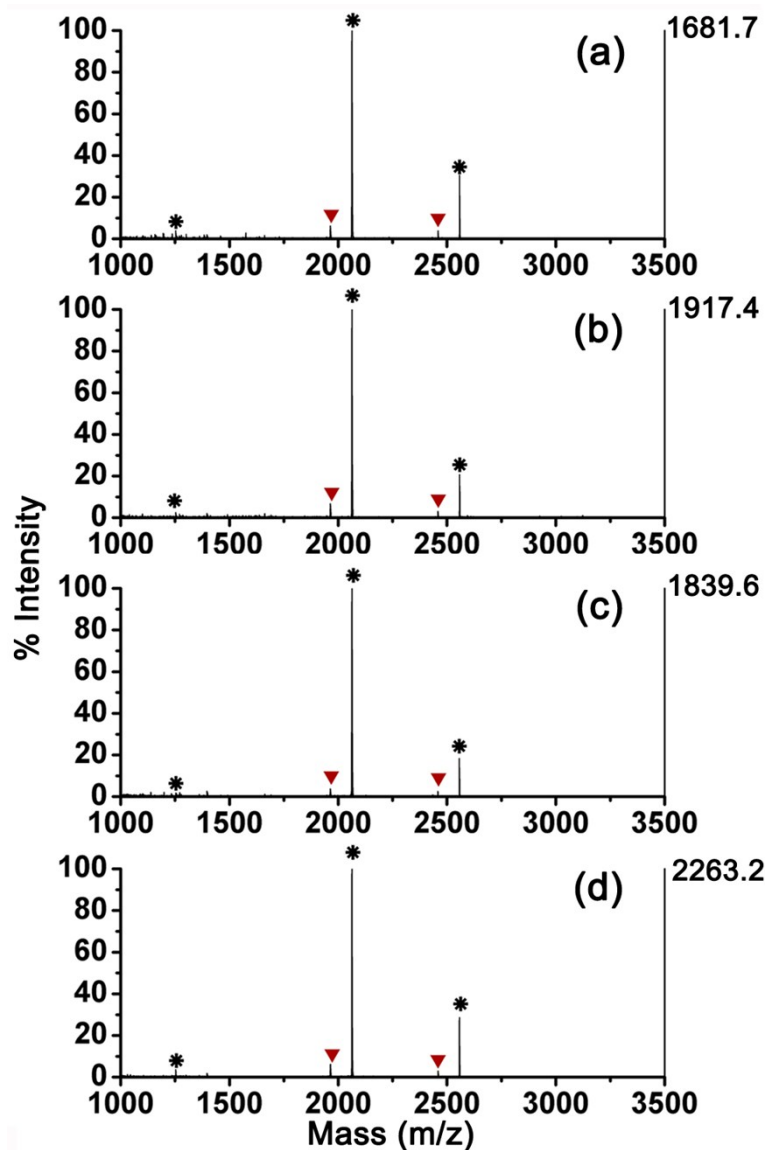

**Fig. S5** MALDI-TOF mass spectra for the peptides derived from  $\beta$ -casein tryptic digest after enrichment with UiO-67 NPs using different washing protocols: (a) rinsed with 10% ACN/0.1% TFA for three times, (b) rinsed with 30% ACN/0.1% TFA for three times, (c) rinsed with 50% ACN/0.1% TFA for three times and (d) rinsed with 30% ACN/0.1% TFA containing 200 mM NaCl for once and subsequently washed with 30% ACN/0.1% TFA for twice.

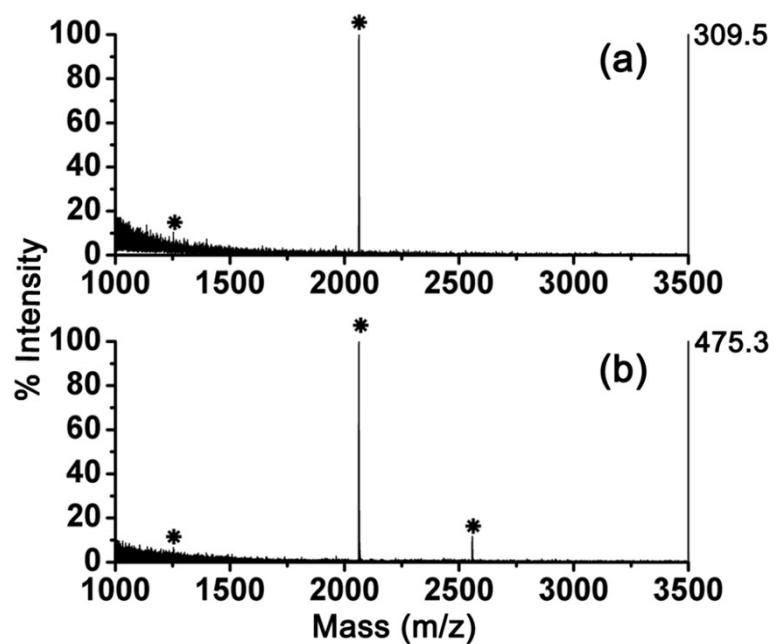

**Fig. S6** MALDI-TOF mass spectra of 0.1 fmol  $\mu\text{L}^{-1}$   $\beta$ -casein tryptic digest after enrichment by (a) UiO-66 and (b) UiO-67 NPs using the optimized protocol.

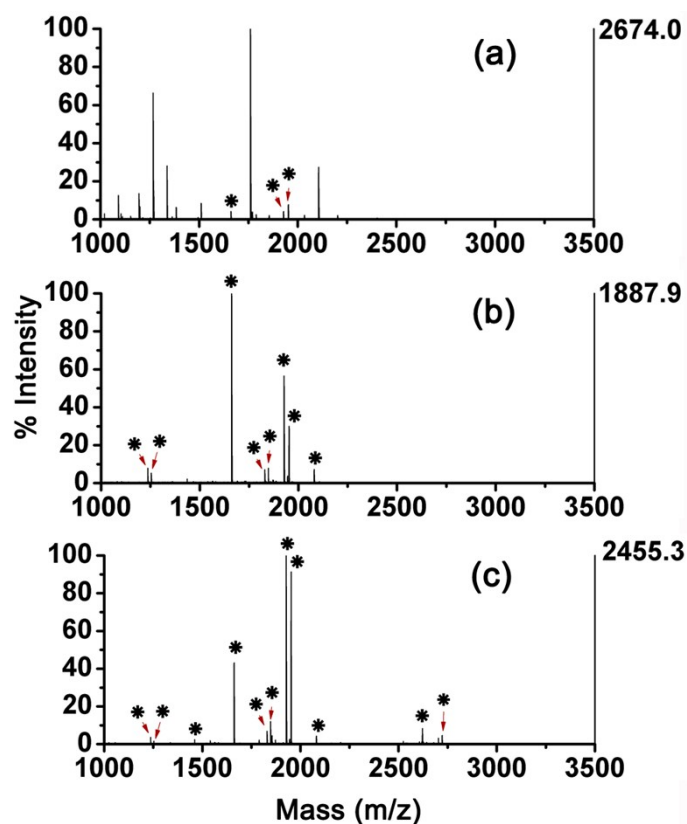

**Fig. S7** MALDI-TOF mass spectra of digest of  $\alpha$ -casein (5 pmol) by (a) direct analysis, and enrichment with (b) UiO-66 and (c) UiO-67 NPs.  $\nearrow$  indicates phosphopeptides.

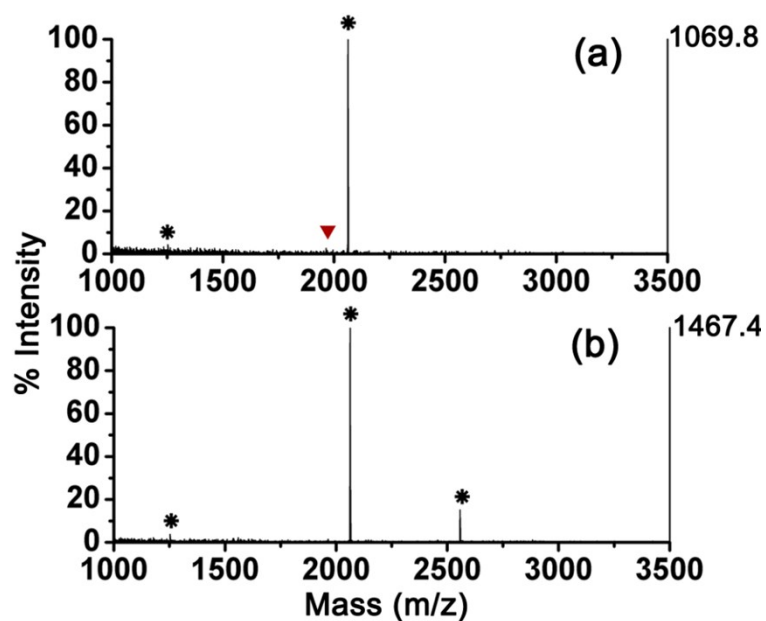

**Fig. S8** MALDI-TOF mass spectra of peptide mixtures of tryptic digests of  $\beta$ -casein and BSA with molar ratio of 1:200 after enrichment by (a) UiO-66 and (b) UiO-67 NPs.

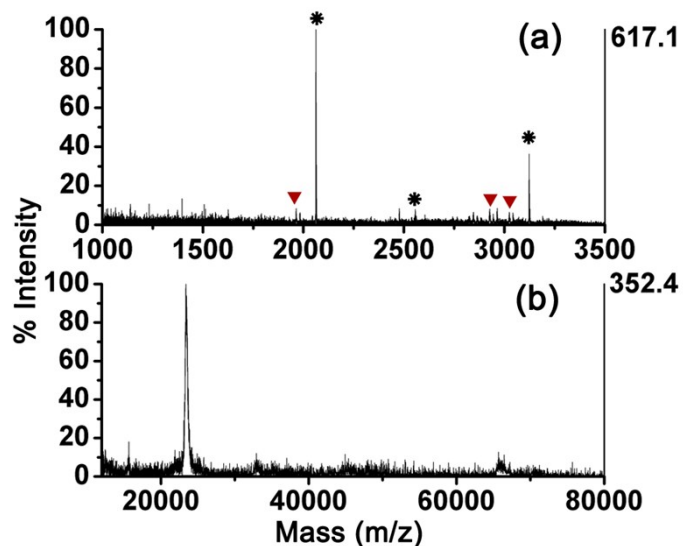

**Fig. S9** MALDI-TOF mass spectra of tryptic digests of  $\beta$ -casein, undigested  $\alpha$ -casein and BSA with molar ratio of 1:100:100 enriched by commercially available  $\text{ZrO}_2$ : (a) peptides analysis and (b) proteins analysis.  $\square \nearrow$  and  $\odot$  indicate phosphopeptides and their dephosphorylated counterparts, respectively.

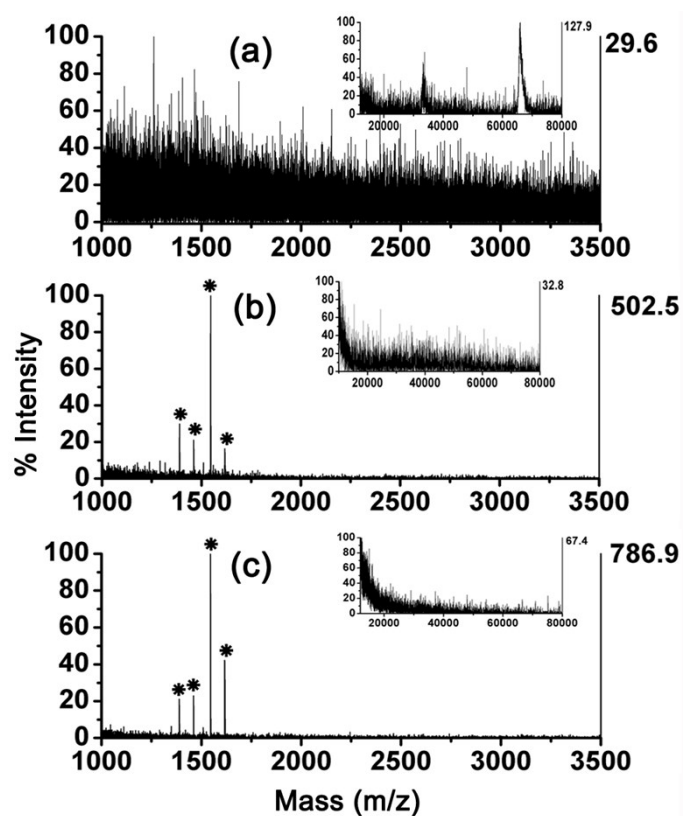

**Fig. S10** MALDI-TOF mass spectra of human serum by (a) direct analysis, and enrichment with (b) UiO-66 and (c) UiO-67 NPs.  $\square \nearrow$  indicates phosphopeptides.

**Table S1.** Phosphopeptides identified from human serum after enrichment with UiO-66 and UiO-67

| Peak no | m/z  | peptide sequence    |
|---------|------|---------------------|
| 1       | 1389 | D[pS]GEGDFLAEGGGV   |
| 2       | 1460 | AD[pS]GEGDFLAEGGGV  |
| 3       | 1545 | D[pS]GEGDFLAEGGGVR  |
| 4       | 1616 | AD[pS]GEGDFLAEGGGVR |
